# Supplementary material for: Plasma proteomics identify biomarkers predicting Parkinson’s disease up to 7 years before symptom onset
Source: Nat Commun. 2024 Jun 18;15:4759. doi: 10.1038/s41467-024-48961-3 (PMC11189460; doi:10.1038/s41467-024-48961-3)
Supplement: Supplementary file 1 — Supplementary Information [file 41467_2024_48961_MOESM1_ESM.pdf]

### **Supplementary Methods 1. *Protein expression similarities and differences between plasma, serum and CSF***

We determined the expression of the blood-derived biomarkers in our panel and compared them to those in CSF to ascertain if they could have originated from the brain. Additionally, to determine if serum and plasma gave identical results, **phases 0 and I** were also carried out in plasma samples, but for **phase II** analyses, only serum samples were available. We analysed our panel in paired plasma, serum, and CSF from subjects with various neurological disorders. The analysis revealed large differences between the blood- and CSF-protein expressions in a PCA (results can be found in **Supplementary Figure 4**). An OPLS-DA model comparing CSF and plasma/serum was strongly significant (ANOVA  $p = 2.0E-20$ , permutations  $p \ll 0.001$ ) and demonstrated that SOD3, PTGDS, CST3, DKK3, FABP5, PRG1, PLD3, APOE and HPX were elevated in CSF while all other proteins, apart from HSP1L, HSPA5 and VCAM1, were higher in the blood-based plasma and serum samples. CSF demonstrated limited correlations with both plasma and serum for all proteins in the predictive panel, apart from MASP2 which was positively correlated (plasma/serum vs CSF,  $\rho = 0.66/0.81$ ). The blood-derived proteins from our panel demonstrated higher values than the CSF proteins for all but DKK3 and PTGDS, which were roughly 80 and 340 times higher, respectively, than the proteins measured in blood.

Individual OPLS-DA models of plasma and serum versus CSF did not differ significantly but reflected the observations from the overall blood- versus brain-based model. Comparing plasma and serum, we found that the levels of the proteins FGA, PGK1, SERPINF2, HSPA5, TUBA4A, GRN, HSPA1L and ADIPOQ differed— all of which were higher in plasma, except for ADIPOQ which was higher in serum.

Investigating the expression of the proteins in our predictive SVM panel in detail, we correlated the paired samples from the three matrices with each other. We noted that plasma and serum demonstrated positive correlations (Spearman's  $\rho$  0.75 – 0.93) for the five of the eight proteins: C3, GRN, ICAM1, MASP2 and SERPING1, but not for HSPA5, DKK3 and PTGDS, see **Supplementary Figure 4**. Although a high degree of correlation was observed between plasma and serum, we consider that the performs better in plasma as this is the sample matrix it was developed in.

### **Supplementary Methods 2. *Age and sex influence on the protein expression***

In our protein panel, several proteins correlated with age or sex. Elevated levels of CST3, PTGDS, VCAM1, A2M, and SOD3 correlated with increasing age. We found that SPP2, ADIPOQ, SOD3, APOE, ITIH2, and PKM were expressed in higher levels in women compared to men. To ensure that the age/sex correlations identified in these proteins did not affect the expression related to the differences between PD and control samples, we adjusted the data for age and sex and obtained Benjamini-Hochberg multiple testing corrected p-values for the comparison between PD and HC and related these to the p-values from the unadjusted model. Apart from CST3 and VCAM1, all results remained unchanged. Since PTGDS made part of the predictive SVM panel, we removed this variable from the model to ascertain that the classification was not biased by age. We compared the outcomes from the models with and without PTGDS and found that they produced identical results in the initial test and training dataset, thus indicating that the model is not influenced by age-protein correlations.

### **Supplementary Methods 3. Evaluation of the larger iRBD cohort, with longitudinal samples (Phase II)**

The longitudinal iRBD samples (146, phase II) were applied to (i) the PD vs. control OPLS-DA model that had been constructed using the initial sample set, and (ii) our refined and simplified discriminant support vector machine model consisting of eight proteins. The OPLS-DA model contained the detectable proteins and resulted in 107 of 146 iRBD samples being identified as PD or control, and 39 samples as unclassified. Analysis of these new iRBD samples demonstrated that 70% were consistently identified as having a PD panel profile. Longitudinally, 22 of the 40 individuals with longitudinal follow-up samples were consistently classified as PD. The SVM model classified 79% of the samples as PD. At the time of analysis, 16 of the 54 subjects in our longitudinal iRBD validation cohort had developed PD/DLB. Out of these samples with a known clinical outcome, our SVM model identified ten individuals with all their timepoints as PD. Of the 11 PD converters, eight were identified as PD. The earliest correct classification was 7.3 years prior to diagnosis and the latest was 0.9 years prior to diagnosis (average  $3.5 \pm 2.4$  years). In 26 of the 40 individuals with longitudinal follow-up samples the baseline samples and all longitudinal samples demonstrated a PD profile, while four individuals had all their timepoints classified as controls. Ten individuals demonstrated indeterminate predictions, with timepoints from the same individual showing a PD profile in most, but not all samples. Generally, the samples predicted as controls in the SVM model corresponded to the samples with no prediction outcome in the OPLS-DA model. In those subjects who converted to PD/DLB (stage 3 NSD) during follow-up, eight of eleven were observed to have the PD profile through all timepoints and the remaining three patients demonstrated a change to a PD profile during follow-up. (**Supplementary Figure S6**).

### **Supplementary Notes 1. Members of the PROPAG-AGING consortium**

Astrid Adarmes-Gómez,  
Tiago Azevedo,  
Maria-Giulia Bacalini,  
Luca Baldelli,  
Anna Bartoletti-Stella,  
Kailash P. Bhatia,  
Bonilla-Toribio Marta,  
Claudia Boninsegna,  
Marcella Broli,  
Buiza-Rueda Dolores,  
Giovanna Calandra-Buonaura,  
Sabina Capellari,  
Mario Carrión-Claro,  
Rosalía Cileá,  
Robert Clayton,  
Pietro Cortelli,  
Alessandra Dal Molin,  
Silvia De Luca,  
Patrizia De Massis,  
Giovanna Maria Dimitri,  
Ivan Doykov,  
Rocio Escuela-Martin,  
Giovanni Fabbri,

Claudio Franceschi,  
Anna Gabellini,  
Paolo Garagnani,  
Cristina Giuliani,  
Pilar Gómez-Garre,  
Pietro Guaraldi,  
Sara Hägg,  
Jenny Hällqvist,  
Claire Halsband,  
Wendy Heywood,  
Henry Houlden,  
Ismae Huertas,  
Silvia Jesús,  
Juulia Jylhävä,  
Miguel A. Labrador-Espinosa,  
Cristina Licari,  
Pietro Liò,  
Claudio Luchinat,  
Daniel Macias,  
Stefania Macrì,  
Francesca Magrinelli,  
Juan Francisco Martín Rodríguez,  
Delledonne Massimo,  
Maria Giovanna Maturo,  
Giacomo Mengozzi,  
Gaia Meoni,  
Francesco Mignani,  
Maddalena Milazzo,  
Kevin Mills,  
Pablo Mir,  
Brit Mollenhauer,  
Christine Nardini,  
Stefania Alessandra Nassetti,  
Nancy L. Pedersen,  
Maria Teresa Perinán-Tocino,  
Chiara Pirazzini,  
Federica Provini,  
Francesco Ravaioli,  
Claudia Sala,  
Luisa Sambati,  
Cesa Lorella Maria Scaglione,  
Sebastian Schade,  
Sebastian Schreglmann,  
Simeon Spasov,  
Stephen Strom,  
Cristina Tejera-Parrado,  
Leonardo Tenori,  
Claudia Trenkwalder,  
Paola Turano,  
Franco Valzania,  
Rosario Vigo Ortega,  
Dylan Williams,  
Luciano Xumerle  
& Elisa Zago

## Supplementary Tables

**Supplementary Table 1. Characteristics of the Parkinson's disease subjects and healthy controls included in the discovery proteomics study (phase 0):** The table shows age, sex, MDS-UPDRS part III and MMSE score in addition to the disease duration for each individual. Abbreviations: MMSE= Mini-Mental State Examination, UPDRS= Unified Parkinson's Disease Rating Scale, DNP= de novo Parkinson's disease; HC= Healthy control; SD= Standard deviation

| Subject             | Age (years)        | Sex           | MDS-UPDRS III      | MMSE               | Disease duration (months) |
|---------------------|--------------------|---------------|--------------------|--------------------|---------------------------|
| DNP01               |                    | Male          | 21                 | 30                 | 18                        |
| DNP02               |                    | Male          | 20                 | 30                 | 72                        |
| DNP03               |                    | Male          | 17                 | 29                 | 17                        |
| DNP04               |                    | Male          | 28                 | 29                 | 24                        |
| DNP05               |                    | Male          | 6                  | 29                 | 8                         |
| DNP06               |                    | Female        | 56                 | 28                 | 20                        |
| DNP07               |                    | Male          | 35                 | 28                 | 9                         |
| DNP08               |                    | Male          | 15                 | 30                 | 12                        |
| DNP09               |                    | Male          | 66                 | 28                 | 24                        |
| DNP10               |                    | Female        | 35                 | 27                 | 20                        |
| Average ( $\pm$ SD) | <b>66.1 (10.8)</b> | <b>8 Male</b> | <b>29.9 (17.8)</b> | <b>28.8 (0.98)</b> | <b>22.4 (17.4)</b>        |
| HC01                |                    | Female        | 0                  | 30                 | n/a                       |
| HC02                |                    | Female        | 0                  | 28                 | n/a                       |
| HC03                |                    | Female        | 0                  | 30                 | n/a                       |
| HC04                |                    | Female        | 1                  | 29                 | n/a                       |
| HC05                |                    | Male          | 2                  | 29                 | n/a                       |
| HC06                |                    | Male          | 4                  | 30                 | n/a                       |
| HC07                |                    | Male          | 0                  | 27                 | n/a                       |
| HC08                |                    | Male          | 0                  | 29                 | n/a                       |
| HC09                |                    | Female        | 4                  | 28                 | n/a                       |
| HC10                |                    | Male          | 0                  | 29                 | n/a                       |
| Average ( $\pm$ SD) | <b>65.7 (8.6)</b>  | <b>5 Male</b> | <b>1.1 (1.6)</b>   | <b>28.9 (0.94)</b> |                           |

**Supplementary Table 2. Peptides included in the targeted proteomic assay (phases I and II):** The peptides are represented by gene name, followed by protein name, and peptide amino acid sequence. The transitions from precursor ion to product ions (quantifier and qualifier) are also shown. Internal standards are found at the bottom of the table in italics.

| Gene     | Protein                                       | AA sequence            | Transitions (precursor > quant/qual) |
|----------|-----------------------------------------------|------------------------|--------------------------------------|
| A2M      | Alpha-2-macroglobulin                         | AFQPFVELTMPYSVIR       | 1023.03 > 1079.59/1208.63            |
| ADIPOQ   | Adiponectin                                   | IFYNQNHHDGSGTK         | 591.27 > 666.32/1106.49              |
| ANXA2    | Annexin A2                                    | TNQELQEINR             | 622.82 > 659.35/772.43               |
|          |                                               | TPAQYDASELK            | 611.8 > 825.4/1024.49                |
| APOE     | Apolipoprotein E                              | LGPLVEQGR              | 484.78 > 588.31/701.39               |
| APP      | Amyloid-beta precursor protein                | GLTTRPGSGLTNIK         | 472.27 > 572.33/622.85               |
|          |                                               | YLETSGDENEHAHFQK       | 638.96 > 767.39/1010.48              |
| ATIC     | Bifunctional purine biosynthesis protein PURH | DVSELTGFPEMLGGR        | 804.39 > 759.38/963.47               |
|          |                                               | HVSPAGAAVGIPLSEDEAK    | 616.65 > 847.44/888.43               |
| BCAP29   | B-cell receptor-associated protein 29         | SSTSRLPDYEHTQMK        | 435.2 > 468.72/504.23                |
| BCHE     | Cholinesterase                                | YGNPNETQNNSTSWPVFK     | 1041.98 > 490.3/874.92               |
|          |                                               | YLTLNTESTR             | 599.31 > 707.33/921.46               |
| C15orf62 | Chromosome 15 Open Reading Frame 62           | EQFPSEPSF              | 534.24 > 350.17/718.3                |
|          |                                               | LPLWGDEQPR             | 605.81 > 701.32/887.4                |
| C3       | Complement C3                                 | TVMVNINPEGIPVK         | 820.44 > 853.48/982.52               |
| CAPN2    | Calpain-2 catalytic subunit                   | NFFLTNR                | 456.24 > 650.36/797.43               |
|          |                                               | SDTFINLR               | 483.26 > 515.33/763.45               |
| CCL2     | C-C motif chemokine 2                         | WVQDSMDHLDK            | 458.54 > 845.38/960.41               |
| CCL4     | C-C motif chemokine 4                         | NFVVDYYETSSLCSPAVVFQTK | 894.76 > 889.47/1104.56              |
| CCL13    | C-C motif chemokine 13                        | SYVITTSR               | 463.75 > 577.33/676.4                |
| CCL17    | C-C motif chemokine 17                        | DAIVFVTVQGR            | 602.84 > 806.45/905.52               |
| CCL22    | C-C motif chemokine 22                        | HFYWTSDSCPRPGVVLLTFR   | 610.31 > 627.89/649.4                |
| CCL24    | C-C motif chemokine 24                        | GQQFCGDPK              | 518.73 > 576.22/723.29               |
| CCL26    | C-C motif chemokine 26                        | SYEFTSNCSQR            | 733.3 > 838.35/939.39                |
| CD200R1  | CD200 Receptor 1                              | QITQNYSK               | 491.09 > 370.66/740.45               |
| CD22     | B-cell receptor CD22                          | EVQFFWEK               | 556.77 > 609.3/756.37                |
| CHI3L1   | Chitinase-3-like protein 1                    | VTIDSSYDIAK            | 606.31 > 696.36/783.39               |
| COL4A2   | Collagen alpha-2(IV) chain                    | GLDGYQGPDPGR           | 616.29 > 541.27/726.35               |
|          |                                               | SVSIGYLLVK             | 539.83 > 692.43/892.55               |
| COL6A3   | Collagen alpha-3(VI) chain                    | QLGTVQQVISER           | 679.38 > 859.46/1116.6               |
| CPS1     | Carbamoyl-Phosphate Synthase 1                | FVHDNYVIR              | 388.2 > 458.74/779.4                 |
| CRP      | C reactive protein                            | APLTKPLK               | 289.86 > 586.39/699.48               |
|          |                                               | ESDTSYVSLK             | 564.77 > 696.39/797.44               |
| CS       | Citrate synthase, mitochondrial               | ALGVLAQLIWSR           | 663.92 > 448.06/561.1                |
| CSF1R    | Colony Stimulating Factor 1 Receptor          | NVLLTNHGVAK            | 583.34 > 625.34/726.39               |
|          |                                               | VVEATAFGLGK            | 546.31 > 764.43/893.47               |
| CST3     | Cystatin-C                                    | ALDFAVGEYNK            | 613.81 > 780.39/927.46               |
| CTHRC1   | Collagen Triple Helix Repeat Containing 1     | GDASTGWNSVSR           | 618.78 > 805.4/906.44                |
| CUL5     | Cullin-5                                      | YVEQLLTLFNR            | 698.39 > 763.45/876.53               |
| CYCS     | Cytochrome c                                  | GIIWGEDTLMEYLENPK      | 670 > 763.35/892.39                  |
|          |                                               | TGPNLHGLFGR            | 390.21 > 505.78/534.29               |

|          |                                              |                      |                          |
|----------|----------------------------------------------|----------------------|--------------------------|
| DCXR     | L-xylulose reductase                         | AVIQVSQIVAR          | 592.36 > 772.47/900.53   |
|          |                                              | TQADLDSLVR           | 559.39 > 474.52/888.86   |
| DKK3     | Dickkopf WNT signalling pathway inhibitor 3  | EVPDEYEVGSFMEEVR     | 957.92 > 843.87/1053.5   |
|          |                                              | SAVEEMEAEAAAAK       | 732.83 > 949.43/1078.47  |
| EFNA5    | Ephrin A5                                    | VENSLEPADDTVHESAEPSR | 728 > 755.84/820.36      |
|          |                                              | VFDVNDK              | 418.71 > 590.28/737.35   |
| ENDOU    | Endonuclease, poly(U) specific               | YGSEQEFVDDLK         | 715.33 > 865.43/1266.58  |
| EPO      | Erythropoietin                               | EVWQGLALLSEAVLR      | 842.78 > 674.61/1141.94  |
|          |                                              | TITADTFR             | 462.74 > 609.3/710.35    |
| FABP5    | Fatty acid binding protein 5                 | ELGVGIALR            | 464.28 > 529.35/685.44   |
|          |                                              | TTQFSTLGEK           | 556.29 > 781.41/909.47   |
| FGA      | Fibrinogen alpha chain                       | AQLVDMK              | 402.72 > 492.25/605.33   |
|          |                                              | GLIDEVNQDFTNR        | 760.87 > 894.41/1237.54  |
| FGF2     | Basic fibroblast growth factor 2             | LESNNYNTYR           | 637.29 > 716.34/830.38   |
| FGF21    | Fibroblast growth factor 21                  | EDGTVGGAADQSPESLLQLK | 672.34 > 464.28/701.46   |
|          |                                              | YLYTDDAQQTEAHLEIR    | 689.33 > 813.89/895.42   |
| GRN      | Granulin precursor                           | AVALSSSVMCPDAR       | 732.35 > 1022.44/1109.47 |
|          |                                              | ENATTDLLTK           | 553.29 > 690.4/791.45    |
| HBE1     | Haemoglobin subunit epsilon                  | EFTPEVQAAWQK         | 717.36 > 830.45/1056.55  |
|          |                                              | MNVEEAGGEALGR        | 666.81 > 730.38/859.43   |
| HELLS    | Lymphoid-specific helicase                   | LISIQPEVDR           | 649.36 > 743.37/984.51   |
| HPX      | Hemopexin                                    | YYCFQGNQFLR          | 748.34 > 862.45/1009.52  |
| HSPA1L   | Heat shock 70 kDa protein 1-like             | VEIANDQGNR           | 614.82 > 703.31/774.35   |
| HSPA5    | Endoplasmic reticulum chaperone BiP          | ITITNDQNR            | 537.78 > 747.34/860.42   |
| HSPA8    | Heat shock cognate 71 kDa protein            | DAGTIAGLNVLR         | 600.34 > 742.46/855.54   |
| HSP90AB1 | Heat shock protein HSP 90-beta               | SIYYITGESK           | 580.8 > 634.34/797.4     |
| HSPD1    | Heat Shock Protein Family D (Hsp60) Member 1 | VTDALNATR            | 480.76 > 645.37/760.39   |
| ICAM1    | Intercellular adhesion molecule 1            | ASVSVTAEDGTQR        | 725.34 > 834.36/1006.44  |
|          |                                              | LLGIETPLPK           | 540.84 > 797.48/854.5    |
| IFNG     | Interferon gamma                             | AIHELIQVMAELSPAACK   | 911.15 > 386.13/473.19   |
|          |                                              | IMQSQIVSFYFK         | 745.89 > 903.5/1031.56   |
| IL1A     | Interleukin-1 alpha                          | ESMVVVATNGK          | 567.79 > 589.33/688.4    |
| IL1B     | Interleukin-1 beta                           | SLVMSGPYELK          | 612.32 > 793.41/924.45   |
| IL2      | Interleukin-2                                | DLISNINVIVLELK       | 791.97 > 813.54/927.59   |
| IL4      | Interleukin-4                                | EANQSTLENFLER        | 775.88 > 807.4/920.48    |
| IL5      | Interleukin-5                                | TLLIANETLR           | 572.34 > 703.37/816.46   |
| IL6      | Interleukin-6                                | YILDGISALR           | 560.82 > 616.38/844.49   |
| IL7      | Interleukin-7                                | LNDLCFLK             | 511.77 > 680.38/795.41   |
| IL10     | Interleukin-10                               | AMSEFDIFINYIEAYMTMK  | 1159.71 > 379.34/510.43  |
|          |                                              | DQLDNLLK             | 536.31 > 715.43/828.52   |
| IL12A    | Interleukin-12 subunit alpha                 | TSTVEACLPLELTK       | 781.41 > 700.4/1173.6    |
| IL12B    | Interleukin-12 subunit beta                  | EDGIWSTDILK          | 638.82 > 676.39/862.47   |
| IL13     | Interleukin-13                               | ELIEELVNITQNQK       | 835.95 > 944.52/1057.6   |
| IL15     | Interleukin-15                               | TEANWVNVISDLK        | 744.89 > 788.45/887.52   |
| IL16     | Pro-interleukin-16                           | DPGVSESPPPGR         | 597.79 > 739.37/925.47   |
| IRAK4    | Interleukin-1 receptor-associated kinase 4   | SANILLDEAFTAK        | 696.87 > 781.37/894.46   |

|          |                                              |                          |                          |
|----------|----------------------------------------------|--------------------------|--------------------------|
| ITIH2    | Inter-alpha-trypsin inhibitor heavy chain 2  | TEVNVLPGAK               | 514.29 > 698.42/797.49   |
|          |                                              | VQFELHYQEVK              | 473.91 > 666.35/803.4    |
| LMO7     | LIM domain only protein 7                    | KPQDQLVIER               | 409.23 > 417.25/710.38   |
| MAPK12   | Mitogen-activated protein kinase 12          | VTGTPPAEFVQR             | 651.35 > 472.25/846.45   |
| MASP2    | Mannan binding lectin serine peptidase 2     | AGYVLHR                  | 408.23 > 425.26/524.33   |
|          |                                              | WPEPVFGR                 | 494.26 > 575.33/801.43   |
| MMP3     | Matrix metalloproteinase 3                   | GNQFWAIR                 | 496.26 > 545.32/692.39   |
|          |                                              | TYFFVEDK                 | 524.75 > 637.32/784.39   |
| MSN      | Moesin                                       | EDAVLEYLK                | 540.28 > 552.3/665.39    |
| MUC5B    | Mucin 5B, oligomeric mucus/gel-forming       | ATNSTATPSSTLGTR          | 783.39 > 919.48/1020.53  |
| NCAM1    | Neural cell adhesion molecule 1              | DGQLLPSSNYSNIK           | 768.39 > 1009.49/1122.58 |
|          |                                              | LEGQMGEDGNSIK            | 689.32 > 819.38/950.42   |
| NDRG1    | N-myc downstream regulated 1                 | ISGWTQALPDMVVSHLFGK      | 696.03 > 615.32/787.45   |
|          |                                              | MADCGGLPQISQPAK          | 786.88 > 868.49/1038.59  |
| NEFL     | Neurofilament light polypeptide              | VLEAELLVLR               | 577.86 > 613.44/813.52   |
|          |                                              | YEEEVLSR                 | 512.75 > 603.35/732.39   |
| NEFM     | Neurofilament medium polypeptide             | FVEEIIIEETK              | 618.82 > 732.41/990.5    |
|          |                                              | SIELESVR                 | 466.76 > 490.26/732.39   |
| NEFH     | Neurofilament heavy polypeptide              | LEQEHLLEDIAHVR           | 426.23 > 595.37/710.39   |
|          |                                              | TSVSSVSASPSR             | 582.8 > 604.3/877.44     |
| NFATC2   | Nuclear Factor Of Activated T Cells 2        | YQQQNPAAVLYQR            | 789.9 > 820.47/917.52    |
| NFKBIZ   | NF-kappa-B inhibitor zeta                    | ASGQAVDDFK               | 519.25 > 694.34/879.42   |
| NLRP3    | NLR Family Pyrin Domain Containing 3         | YLEDLEDVDLK              | 676.34 > 831.45/946.47   |
| OLR1     | Oxidised low-density lipoprotein receptor 1  | QQAEEASQESENELK          | 573.93 > 719.36/848.4    |
| PGAM1    | Phosphoglycerate mutase 1                    | AMEAVAAQGK               | 488.25 > 644.37/773.42   |
| PGK1     | Phosphoglycerate kinase 1                    | VLPGVDALSNI              | 549.5 > 466.54/885.84    |
| PKM      | Pyruvate kinase M                            | ITLDNAYMEK               | 599.29 > 755.34/791.39   |
| PLAU     | Urokinase-type plasminogen activator         | SDALQLGLGK               | 501.28 > 615.38/728.47   |
| PLD3     | Phospholipase D Family Member 3              | ALLNVVDNAR               | 542.81 > 574.29/787.41   |
|          |                                              | LLISCWGHSEPSMR           | 558.27 > 667.27/723.82   |
| PPP3CB   | Protein Phosphatase 3 Catalytic Subunit Beta | GLTPTGMLPSGVLGGR         | 792.43 > 656.86/813.46   |
| PRDX3    | Peroxiredoxin 3                              | GLFIIDPNGVIK             | 643.38 > 742.41/855.49   |
| PRG4     | Proteoglycan 4                               | GFGGLTGQIVAALSTAK        | 795.95 > 1058.62/1159.67 |
| PTGDS    | Prostaglandin-H2 D-isomerase                 | AQGFTEDTIVFLPQTDK        | 955.51 > 363.41/588.56   |
|          |                                              | TMLLQPAGSLGYSYSYR        | 872.44 > 989.47/1157.56  |
| PTGES2   | Prostaglandin E synthase 2                   | QWADDWLVLHLPNVYR         | 704.54 > 735.46/848.62   |
| RANGAP1  | Ran GTPase-activating protein 1              | AFNSSSFNSNTFLTR          | 564.94 > 637.34/751.38   |
|          |                                              | VINLNDNTFTEK             | 704.36 > 968.43/1195.56  |
| SAA1     | Serum amyloid A-1 protein                    | EANYIGSDK                | 498.74 > 682.34/796.38   |
|          |                                              | SFFSFLGEAFDGAR           | 776.22 > 303.33/822.63   |
| SELE     | E-selectin                                   | YTHLVAIQNK               | 396.22 > 573.34/672.4    |
| SERPINA1 | Alpha-1-antitrypsin                          | LSSWVLLMK                | 538.81 > 603.39/876.5    |
| SERPINA3 | Alpha-1-antichymotrypsin                     | LYGSEAFATDFQDSAAAK       | 946.44 > 952.44/1053.48  |
| SERPINF2 | Alpha-2-antiplasmin                          | HQMDLVATLSQLGLQELFQAPDLR | 908.65 > 500.13/1112.82  |

|          |                                          |                       |                           |
|----------|------------------------------------------|-----------------------|---------------------------|
|          |                                          | LGNQEPGGQTALK         | 656.85 > 674.38/771.44    |
| SERPING1 | Plasma protease C1 inhibitor             | LVLLNAIYLSAK          | 659.41 > 765.45/992.58    |
| SMC4     | Structural Maintenance Of Chromosomes 4  | SNNIINETTTT           | 631.82 > 721.35/834.43    |
| SNAP25   | Synaptosomal-associated protein 25       | AWGNNQDGVVASQPAR      | 557.27 > 558.3/629.34     |
|          |                                          | HMALDMGNEIDTQNR       | 582.26 > 633.3/746.38     |
| SOD2     | Superoxide Dismutase 2                   | LTAASVGVQGSQGWGLGFNK  | 1018.02 > 1064.53/1208.58 |
| SOD3     | Superoxide Dismutase 3                   | AGLAASLAGPHSIVGR      | 492.95 > 582.83/618.35    |
|          |                                          | VTGVVLFRR             | 445.78 > 534.34/690.43    |
| SPP2     | Secreted Phosphoprotein 2                | DALSASVVK             | 445.25 > 503.32/590.35    |
|          |                                          | VNSQSLSPYLFRR         | 705.87 > 695.39/782.42    |
| TEK      | Angiopoietin-1 receptor                  | IVDLPDHIEVNNSGK       | 512.61 > 548.28/662.33    |
| THY1     | Thy-1 Cell Surface Antigen               | HVLFQTVGVPEHTYR       | 428.73 > 401.7/479.74     |
| TLR6     | Toll-like receptor 6                     | DMPSEILDVSWNSLESGR    | 1074.49 > 948.79/1035.89  |
| TNF      | Tumour necrosis factor (alpha)           | ANALLANGVELR          | 620.85 > 758.42/871.5     |
|          |                                          | DNQLVVPSEGLYLIYSQVLFK | 1213.38 > 570.24/669.35   |
| TNFB     | Lymphotoxin-alpha                        | MHLAHSTLKPA AHLIGDPSK | 531.79 > 331.2/619.35     |
| TNNT3    | Troponin T3                              | DLMELQALIDSHFEAR      | 629.98 > 764.89/830.41    |
| TOLLIP   | Toll-interacting protein                 | GPVYIGELPQDFLR        | 802.43 > 775.41/1074.56   |
|          |                                          | LNITVVQAK             | 493.31 > 645.39/758.48    |
| TRAP1    | Heat shock protein 75 kDa, mitochondrial | ELGSSVALYSR           | 591.31 > 609.34/882.47    |
| TUBA4A   | Tubulin alpha-4A chain                   | AVFVDLEPTVIDEIR       | 858.46 > 942.53/1299.68   |
|          |                                          | DVNAAIAAIK            | 493.29 > 586.39/771.47    |
| TXN      | Thioredoxin                              | LEATINELV             | 501.22 > 474.11/528.24    |
| UBC      | Polyubiquitin-C                          | TITLEVEPSDTIENVK      | 894.47 > 905.46/1002.51   |
| VCAM1    | Vascular cell adhesion protein 1         | LHIDEMDSVPTVR         | 756.59 > 251.23/472.42    |
|          |                                          | NTVISVNPSTK           | 580.32 > 732.39/944.54    |
| VEGFA    | Vascular endothelial growth factor A     | SWSVYVGAR             | 512.76 > 565.31/751.41    |
| VEGFC    | Vascular endothelial growth factor C     | FAAAHYNTEILK          | 459.91 > 580.31/615.83    |
| VEGFD    | Vascular endothelial growth factor D     | FAATFYDIETLK          | 709.86 > 718.4/881.46     |
| #N/A     | AP_ALDOA_ALQ                             | ALQASALK              | 404.75 > 496.32/624.38    |
| #N/A     | AP_C3_SSL                                | SSLSVPYVIVPLK         | 704.43 > 357.25/934.6     |
| #N/A     | AP_GSTO1_GSA                             | GSAPPGPVPEGSIR        | 664.36 > 556.81/1015.56   |
| #N/A     | AP_RSU1_ALY                              | ALYLSDNDFEILPPDIGK    | 1014.03 > 633.37/746.37   |
| #N/A     | AP_TSP1_TIV                              | TIVTTLQDSIR           | 627.36 > 940.52/1039.59   |
| #N/A     | ENO1_YEAST_GNP                           | GNPTVEVELTTEK         | 709.06 > 623.49/948.68    |

**Supplementary Table 3. Characteristics of longitudinal iRBD subjects (phase II)**

The table shows age, sex, number of longitudinal samples, and the time since baseline for the last sample. Out of the 40 iRBD subjects (27 male), 16 had converted to stage 3 NSD (neuronal synuclein disease) at the time of the last sample (11 Parkinson's disease, five dementia with Lewy bodies). The time from baseline to conversion is shown.

| Subject                            | Age at baseline (years) | Number of longitudinal Follow-up samples | Phenoconversion    | Diagnosis |
|------------------------------------|-------------------------|------------------------------------------|--------------------|-----------|
| iRBD01                             | 65                      | 5                                        | 8 years after BL   | PD        |
| iRBD02                             | 52                      | 5                                        | 6 years after BL   | PD        |
| iRBD03                             | 77                      | 5                                        | 8 years after BL   | PD        |
| iRBD04                             | 64                      | 4                                        |                    |           |
| iRBD05                             | 66                      | 4                                        | 10 years after BL  | DLB       |
| iRBD06                             | 71                      | 3                                        |                    |           |
| iRBD07                             | 71                      | 5                                        | 10 years after BL  | PD        |
| iRBD08                             | 62                      | 4                                        |                    |           |
| iRBD09                             | 64                      | 5                                        | 10 years after BL  | PD        |
| iRBD10                             | 73                      | 5                                        |                    |           |
| iRBD11                             | 69                      | 5                                        | 9 years after BL   | DLB       |
| iRBD12                             | 75                      | 4                                        |                    |           |
| iRBD13                             | 73                      | 4                                        | 9 years after BL   | PD        |
| iRBD14                             | 68                      | 3                                        |                    |           |
| iRBD15                             | 62                      | 4                                        |                    |           |
| iRBD16                             | 64                      | 3                                        | 9 years after BL   | DLB       |
| iRBD17                             | 51                      | 4                                        |                    |           |
| iRBD18                             | 63                      | 2                                        |                    |           |
| iRBD19                             | 54                      | 3                                        |                    |           |
| iRBD20                             | 50                      | 3                                        |                    |           |
| iRBD21                             | 77                      | 3                                        | 8 years after BL   | PD        |
| iRBD22                             | 68                      | 4                                        | 11 months after BL | DLB       |
| iRBD23                             | 73                      | 2                                        |                    |           |
| iRBD24                             | 55                      | 3                                        |                    |           |
| iRBD25                             | 53                      | 3                                        |                    |           |
| iRBD26                             | 68                      | 3                                        | 4 years after BL   | DLB       |
| iRBD27                             | 72                      | 3                                        |                    |           |
| iRBD28                             | 69                      | 2                                        | 2 years after BL   | PD        |
| iRBD29                             | 73                      | 2                                        | 1 year after BL    | PD        |
| iRBD30                             | 77                      | 3                                        |                    |           |
| iRBD31                             | 68                      | 2                                        |                    |           |
| iRBD32                             | 67                      | 3                                        | 7 mos after BL     | PD        |
| iRBD33                             | 74                      | 3                                        |                    |           |
| iRBD34                             | 80                      | 3                                        |                    |           |
| iRBD35                             | 58                      | 2                                        | 1 year after BL    | PD        |
| iRBD36                             | 76                      | 2                                        |                    |           |
| iRBD37                             | 79                      | 2                                        |                    |           |
| iRBD38                             | 70                      | 2                                        |                    |           |
| iRBD39                             | 74                      | 2                                        |                    |           |
| iRBD40                             | 76                      | 2                                        |                    |           |
| <b>Average <math>\pm</math> SD</b> | <b>67.5 (8.1)</b>       | <b>3.3 (1.1)</b>                         | <b>3.7 (2.6)</b>   |           |

Abbreviations: iRBD= isolated REM sleep behaviour disorder; PD= Parkinson's disease; DLB= Dementia with Lewy bodies; BL= Baseline; SD= Standard deviation

**Supplementary Table 4 Significant relationships with longitudinal progression evaluated by linear mixed effects models (phase II):** The table shows the two-sided Student's *t*-*p*-values of the interaction between the time since baseline and each significant clinical variable post Benjamini-Hochberg multiple testing correction ( $\alpha = 0.05$ ), the coefficient and the 95% confidence interval  $\pm$  the standard error.

| Clinical variable                        | Significance | Coefficient | 95 CI $\pm$ SE                  |
|------------------------------------------|--------------|-------------|---------------------------------|
| Hoehn-Yahr                               | 2.1E-2       | 0.011       | [0.0038, 0.0181] $\pm$ 0.0036   |
| UPDRS I                                  | 4.6E-2       | 0.018       | [0.0041, 0.0311] $\pm$ 0.0069   |
| UPDRS III                                | 3.9E-2       | 0.098       | [0.0252, 0.1698] $\pm$ 0.0369   |
| UPDRS I-III                              | 2.1E-2       | 0.16        | [0.0547, 0.2608] $\pm$ 0.0526   |
| UPDRS (sum)                              | 2.1E-2       | 0.16        | [0.0549, 0.261] $\pm$ 0.0526    |
| PD non-motor symptoms measurement (sum)  | 1.6E-2       | 0.12        | [0.0938, 0.1474] $\pm$ 0.0137   |
| PD non-motor symptoms measurement (mean) | 2.1E-2       | 0.0035      | [0.0018, 0.0053] $\pm$ 0.0009   |
| Cholesterol                              | 1.6E-2       | -0.30       | [-0.4841, -0.1186] $\pm$ 0.0932 |

Abbreviations: MMSE= Mini-Mental State Examination, UPDRS= Unified Parkinson's Disease Rating Scale

**Supplementary Table 5. Significant correlations between cholesterol and proteins measured by targeted mass spectrometry, evaluated by Spearman's correlation (phase II):** The table shows the two-sided Student's *t*-test *p*-values of the correlations between cholesterol and the significant proteins post Benjamini-Hochberg multiple testing correction ( $\alpha = 0.05$ ). The correlation coefficient is also shown. The proteins are annotated by gene name.

| Protein  | Significance | Correlation coefficient |
|----------|--------------|-------------------------|
| HSPA8    | 4.9E-5       | 0.50                    |
| APOE     | 2.7E-4       | 0.45                    |
| MASP2    | 3.4E-3       | 0.39                    |
| PRG4     | 1.1E-2       | 0.35                    |
| BCHE     | 1.2E-2       | 0.31                    |
| SERPINA1 | 3.2E-2       | 0.31                    |

## Supplementary Figures

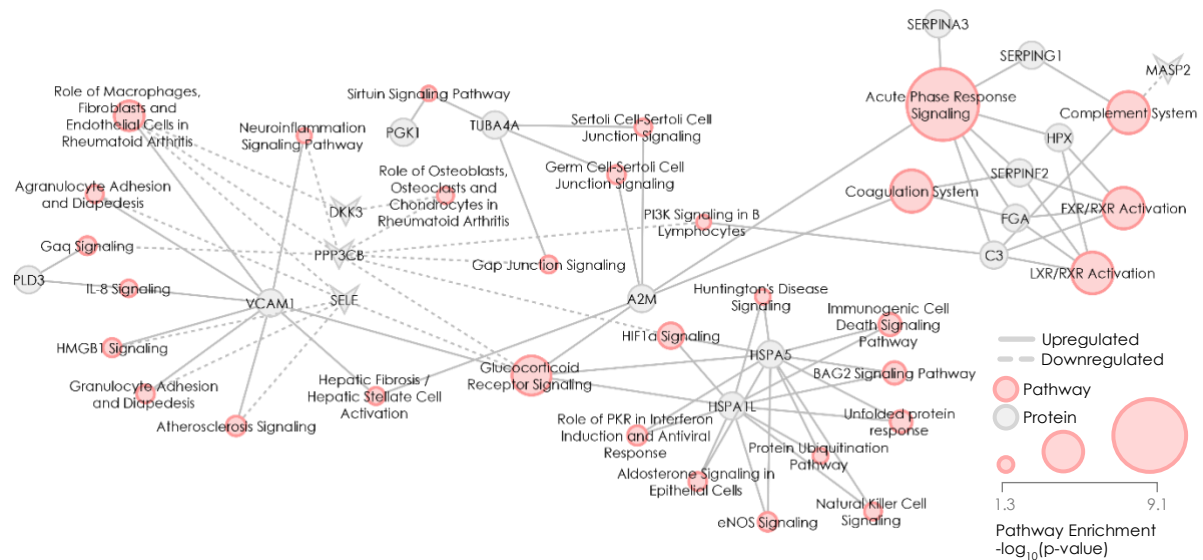

**Supplementary Figure 1. Pathway enrichment based on the expression of the proteins that were significantly different between PD ( $n = 99$ ) and controls ( $n = 36$ ) from the targeted proteomic assay (phase I)**

The analysis was performed in Ingenuity Pathway Analysis using the expression fold-change between the groups. Pathways with an enrichment  $p$ -value  $< 0.05$  and involvement of at least two proteins were considered. The pathways are represented by pink nodes and the proteins by grey nodes. Solid edges represent upregulation of a protein in the Parkinson's disease group compared to controls, while dotted edges represent downregulation. The pathways' node sizes represent the significance of the enrichment  $p$ -values, larger being more significant. The proteins are annotated by gene names. Source data are provided as a Source Data file.

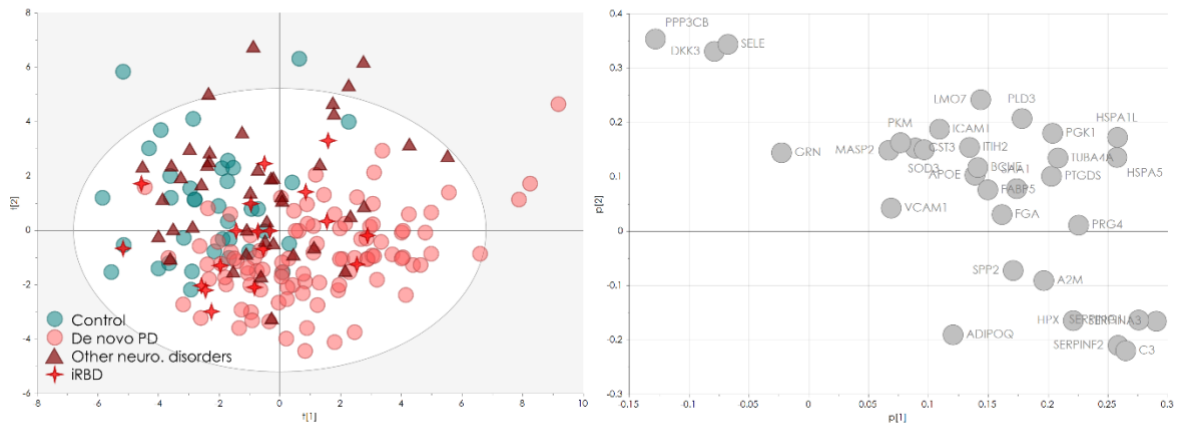

**Supplementary Figure 2. Principal component analysis of the targeted proteomics data showing the groups de novo PD (DNP), isolated REM sleep behaviour disorder (iRBD), other neurological diseases (OND) and controls (phase I)**

(A) PC1 (23.5%) and PC2 (13.9%) show a separation between de novo PD ( $n = 99$ ) and controls ( $n = 36$ ). The iRBD samples ( $n = 18$ ) distribute between de novo PD and controls while other neurological disorders ( $n = 41$ ) mainly cluster with controls, indicating that some iRBD patients could be developing the early hallmarks of motor disease (B) The loadings, where the proteins are represented by gene names, demonstrate that de novo PD are correlated with lower levels of PPP3CB, DKK3, SELE, and GRN. Source data are provided as a Source Data file.

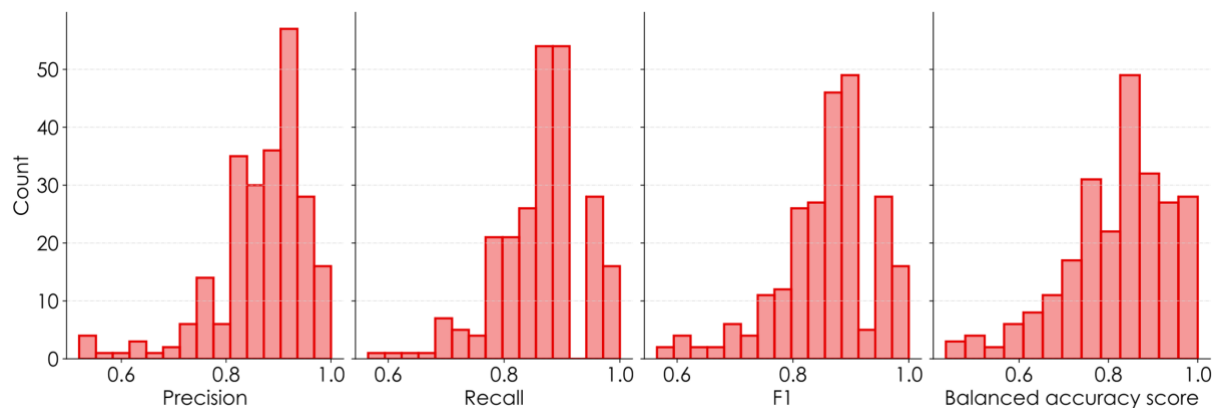

**Supplementary Figure 3. Classification metrics of the discriminant SVM model, predicting samples as PD or control (phase I)**

The classification metrics were calculated from stratified k-fold cross validation utilising six splits of the data and 40 repetitions, and are displayed as histograms showing the frequency of the metrics precision, recall, the F1 score, and the balanced accuracy score. The average and standard deviation was, for precision  $0.87 \pm 0.09$ , for recall  $0.87 \pm 0.08$ , for the F1 score  $0.86 \pm 0.09$ , and for the balanced accuracy score  $0.82 \pm 0.12$ . Source data are provided as a Source Data file.

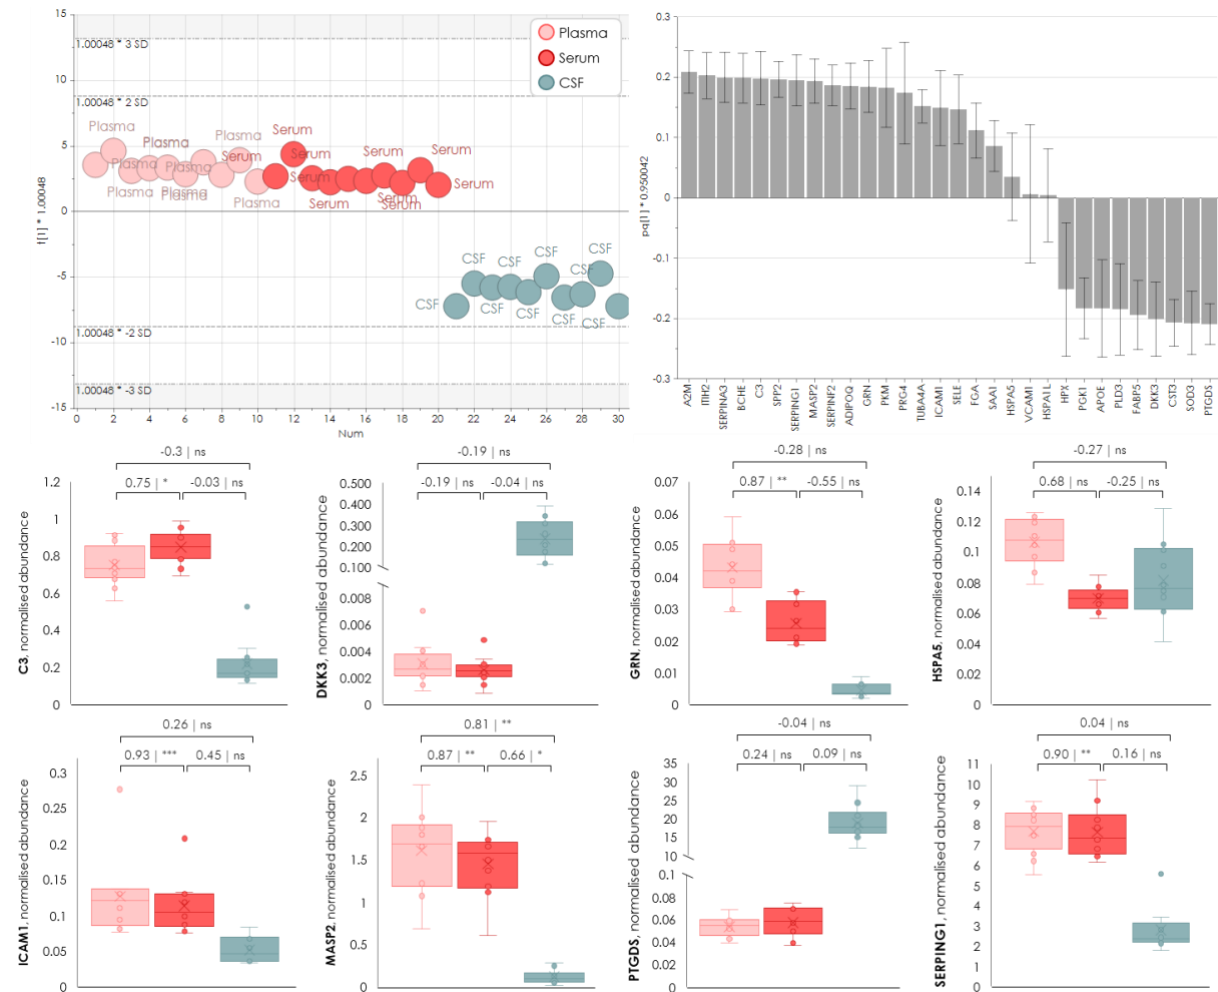

**Supplementary Figure 4. Protein expression in plasma, serum, and CSF**

OPLS-DA scores (top left) from a model of plasma ( $n = 10$ ) and serum ( $n = 10$ ) versus CSF ( $n = 10$ ). The model was highly significant with ANOVA  $p = 2.0E-20$  and permutations  $p < 0.001$ . The corresponding loadings (top right), where the proteins are represented by gene names, demonstrated that all but three proteins were significantly different between the blood-based plasma and serum, and CSF. Most of the proteins were elevated in plasma/serum, though HPX, PGK1, APOE, PLD3, FABP5, DKK3, CST3, SOD3, and PTGDS were higher in CSF. Box and Whisker plots of the paired plasma, serum, and CSF samples, annotated with Spearman's rho and Benjamini-Hochberg multiple testing adjusted ( $\alpha = 0.05$ )  $p$ -value significance levels from Student's two-sided  $t$ -test. The correlation demonstrated that five out of eight of the proteins included in the predictive SVM model were significantly correlated between plasma and serum. Only MASP2 exhibited significant correlations between CSF and plasma/serum. The whiskers show the minimum and maximum and the boxes show the 25th percentile, the median and the 75th percentile. \*\*\*  $p < 0.001$ , \*\*  $p < 0.01$ , \*  $p < 0.05$ , and ns = not significant. Source data are provided as a Source Data file.
